# Supplementary material for: Extending the π-conjugated molecules on TiO2 for the selective photocatalytic aerobic oxidation of sulfides triggered by visible light
Source: Royal Society of Chemistry journal article supplement (doi:10.1039/d1se00053e), 2021-01-01

## Electronic Supplementary Information

# Extending the $\pi$ -conjugated molecules on $\text{TiO}_2$ for selective photocatalytic aerobic oxidation of sulfides triggered by visible light

Hui Li<sup>a</sup>, Xia Li<sup>a</sup>, and Xianjun Lang<sup>a\*</sup>

<sup>a</sup> *Sauvage Center for Molecular Sciences, College of Chemistry and Molecular Sciences, Wuhan University, Wuhan 430072, China.*

\*To whom correspondence should be addressed (Prof. X. J. Lang). E-mail address:

[xianjunlang@whu.edu.cn](mailto:xianjunlang@whu.edu.cn).

## **1. Experimental section**

### ***1.1. Reagents and solvents***

All the reagents were procured from commercial suppliers such as Sigma-Aldrich, Alfa Aesar and TCI, J&K Scientific, etc. Anatase TiO<sub>2</sub> (ST-01) was obtained from Ishihara Sangyo Kaisha, Ltd., Japan. P90 and P25 was kindly supplied by Evonik Industries, China. Rutile TiO<sub>2</sub> was purchased from Sakai chemical Industry CO., Ltd., Japan. The solvents were supplied by Merck, Fischer Scientific and Sinopharm Chemical Reagent Co. Ltd., China. All the reagents and solvents were directly used without further purification.

### ***1.2. General procedure for the photocatalytic oxidation of sulfide***

Firstly, 40 mg of TiO<sub>2</sub> (ST-01),  $1.2 \times 10^{-3}$  mmol 1H2NA, 0.015 mmol of TEMPO and 0.3 mmol of methyl phenyl sulfide were put into the solution of 1 mL CH<sub>3</sub>OH in a 10 mL pyrex vessel. After 5 min of ultrasonic treatment at room temperature, the suspension was stirred for 30 min in dark to reach adsorption-desorption equilibrium. Subsequently, the rubber septum of Pyrex reactor was punched a hole to connect with aerial O<sub>2</sub>. The reactor was vigorously stirred at 1500 rpm and illuminated with 460 nm blue LEDs (Shenzhen Ouying Lighting Science and Technology Co., Ltd. China) concurrently. It's worth noting that all of these reactions take place at room temperature. Finally, 1H2NA-TiO<sub>2</sub> nanoparticles were separated from the reaction mixture by centrifugation and the reaction products were analyzed by gas chromatography

equipped with a flame ionization detector (GC-FID, Agilent 7890B) using bromobenzene as the internal standard. The structures of products were confirmed by comparison with the retention time with authentic samples by GC-FID and further confirmed by gas chromatography–mass spectrometry (GC–MS).

Conversion, selectivity and yield for oxidation of sulfide to the desired sulfoxide were defined as follows:

$$\text{Conv. [\%]} = [(C_0 - C_S)/C_0] \times 100$$

$$\text{Sel. [\%]} = [C_{SO} / (C_0 - C_S)] \times 100$$

$$\text{Yield [\%]} = (C_{SO} / C_0) \times 100$$

where  $C_0$  is the initial concentration of sulfide, and  $C_S$  and  $C_{SO}$  are the concentrations of sulfide and sulfoxide at a certain time during the photocatalytic reaction. For conversions, selectivities and yields, the mean standard deviation was  $\pm 3\%$ . The products were confirmed by the retention time comparison with that of standard samples and further verified by gas chromatography–mass spectrometry.

### ***1.3. Characterization of photocatalytic materials***

X-ray powder diffraction (PXRD) measurement was carried out using a Rigaku/Miniflex 600 diffractometer with filtered Cu  $K\alpha$  radiation, and the data were collected from  $10^\circ$  to  $80^\circ$ . Fourier transform infrared (FT-IR) spectroscopy was performed by Nicolet 5700 FTIR Spectrometer. The UV-visible absorbance of 1H2NA,

1H2NA-TiO<sub>2</sub> and TiO<sub>2</sub> samples were measured on UV-3600 UV-vis spectrophotometer (Shimadzu, Japan) equipped with a diffuse reflectance measurement accessory, BaSO<sub>4</sub> was used as a reflectance standard.

#### ***1.4. EPR experimental procedures***

The EPR experiments was carried out on an electron paramagnetic resonance (EPR) spectrometer (JEOL, JES-FA300). The EPR tube was added with 0.3 mmol of methyl phenyl sulfide, 40 mg of 1H2NA-TiO<sub>2</sub>, 0.3 mmol of 5,5-dimethyl-1-pyrroline-N-oxide (DMPO), 1 mL of CH<sub>3</sub>OH. The signals of DMPO- $\cdot$ OOH were collected at 0 min, 2 min and 4 min respectively under air irradiated by a high-pressure Hg lamp with a filter to select the band of 460 nm in the light chamber of the EPR spectrometer. Next, 0.015 mmol of TEMPO was added to the same EPR tube under air and irradiated with the same light source to collect the signals in situ at 0 min, 2 min and 4 min respectively.

**Table S1.** The influence of different photocatalysts on the blue light-triggered selective photocatalytic aerobic oxidation of methyl phenyl sulfide. <sup>a</sup>

| Entry | Photocatalyst                    | Conv. <sup>b</sup> (%) | Sel. <sup>b</sup> (%) |
|-------|----------------------------------|------------------------|-----------------------|
| 1     | TiO <sub>2</sub> (ST-01)         | 78                     | 89                    |
| 2     | SiO <sub>2</sub>                 | 1                      | >99                   |
| 3     | λ-Al <sub>2</sub> O <sub>3</sub> | 4                      | 99                    |

<sup>a</sup> Reaction conditions: photocatalyst (0.5 mmol), methyl phenyl sulfide (0.3 mmol), 1H2NA ( $1.2 \times 10^{-3}$  mmol), TEMPO (0.015 mmol), blue LEDs (3 W  $\times$  4), CH<sub>3</sub>OH (1 mL), air (1 atm), 1 h. <sup>b</sup> Conversions for methyl phenyl sulfide, selectivities for methyl phenyl sulfoxide were determined by GC-FID using bromobenzene as an internal standard.

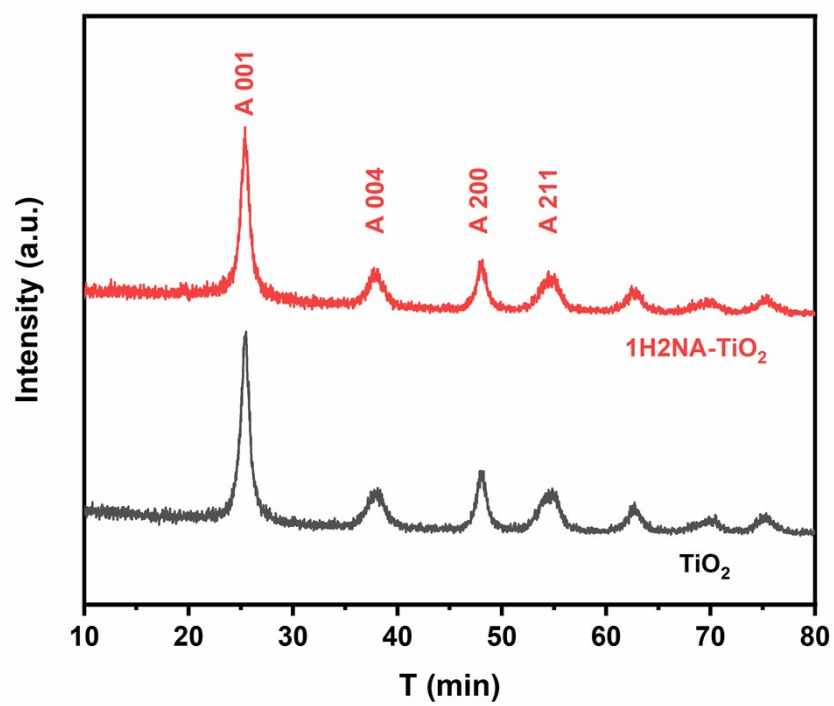

**Fig. S1.** The PXR D patterns of 1H2NA-TiO<sub>2</sub> and anatase TiO<sub>2</sub>.

**Figure S2:** GC-FID results for Table 3

Table 3, Entry 1

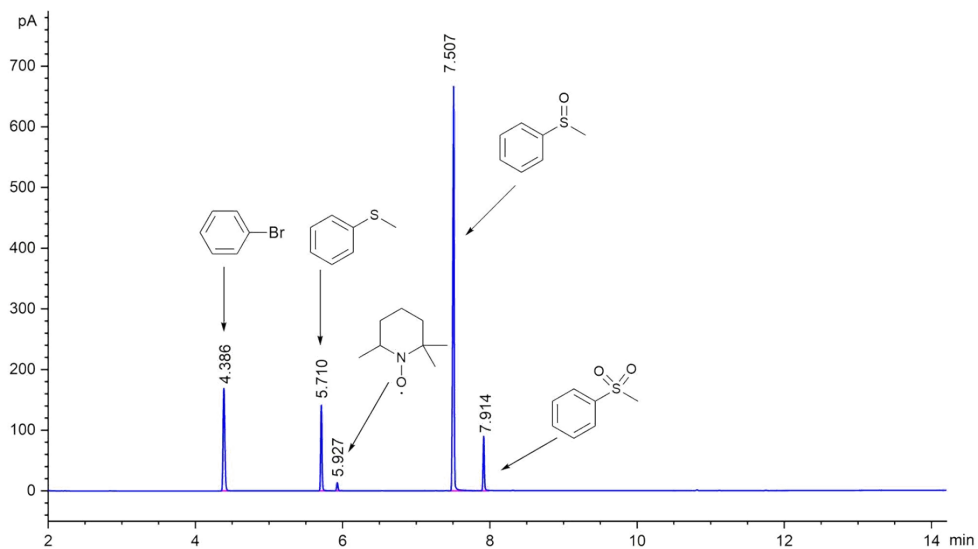

Table 3, Entry 2

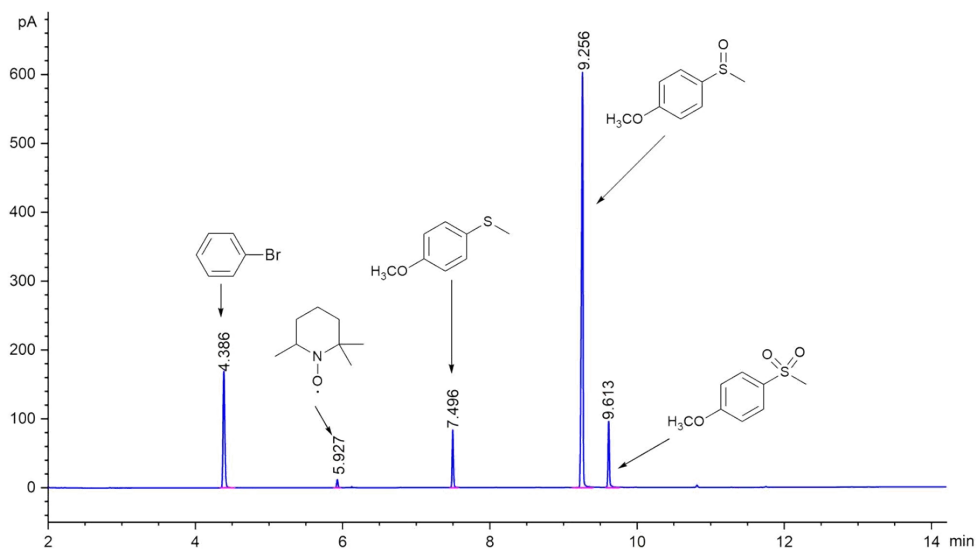

Table 3, Entry 3

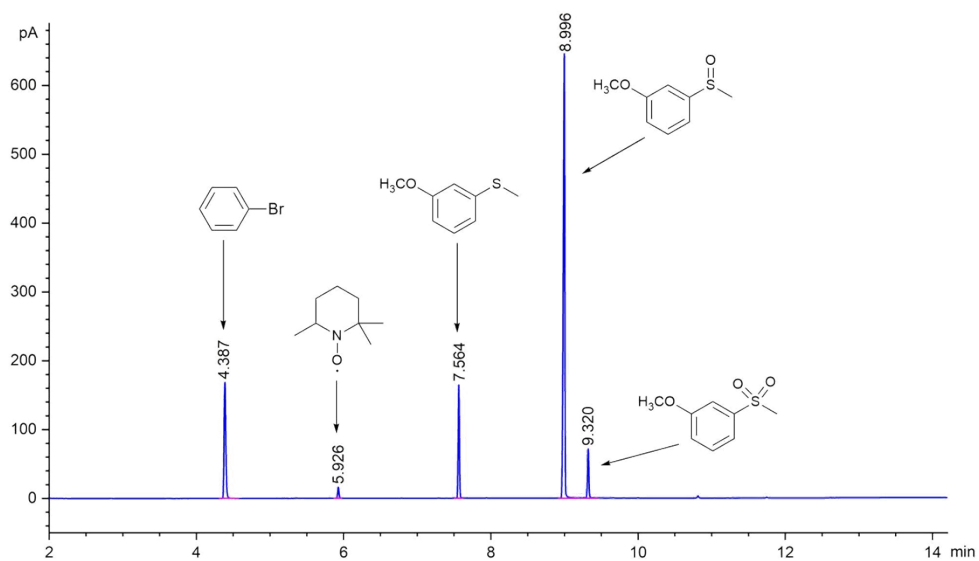

Table 3, Entry 4

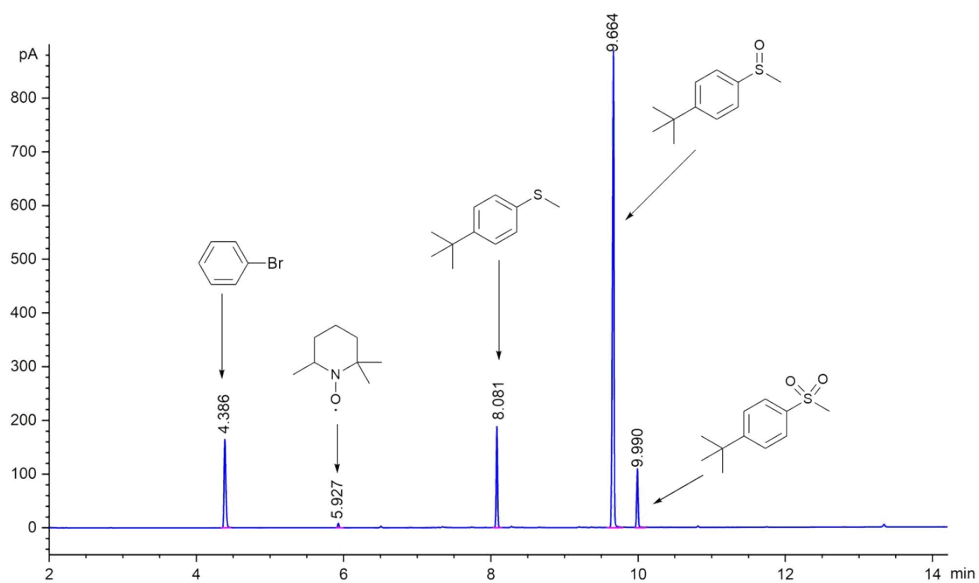



Table 3, Entry 5

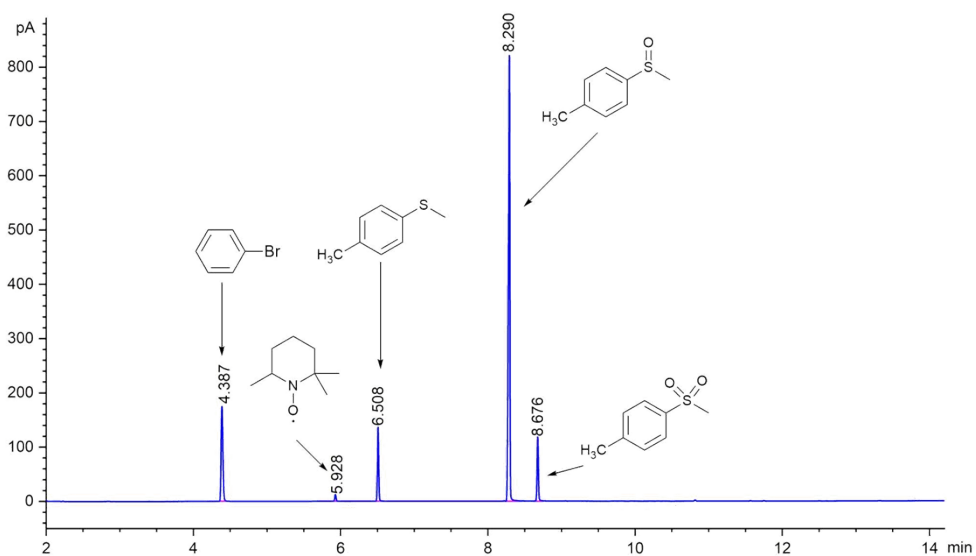

Table 3, Entry 6

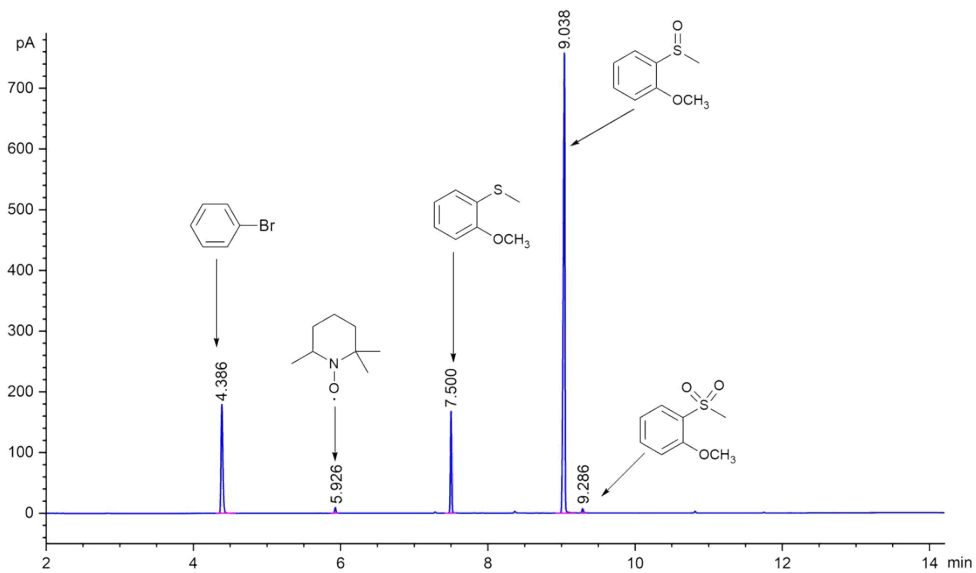

Table 3, Entry 7

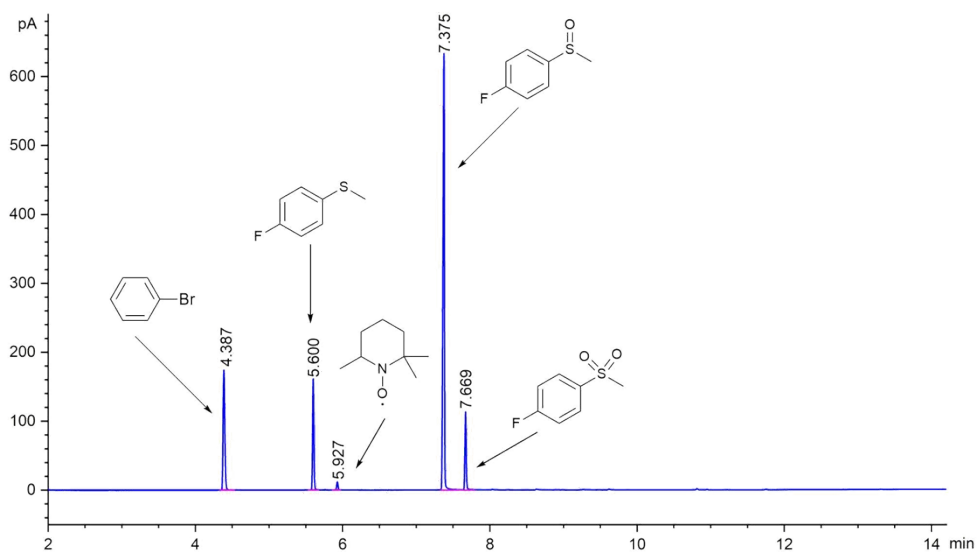

Table 3, Entry 8

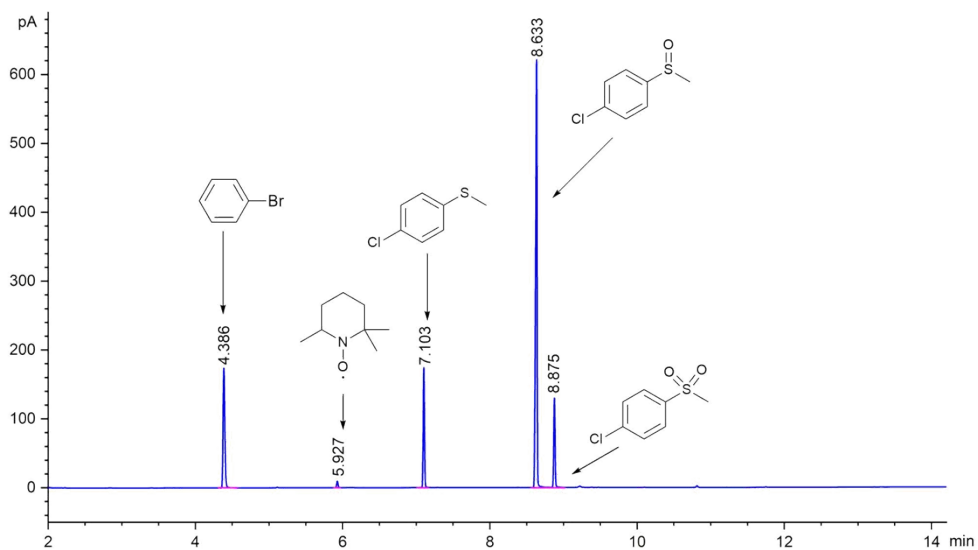

Table 3, Entry 9

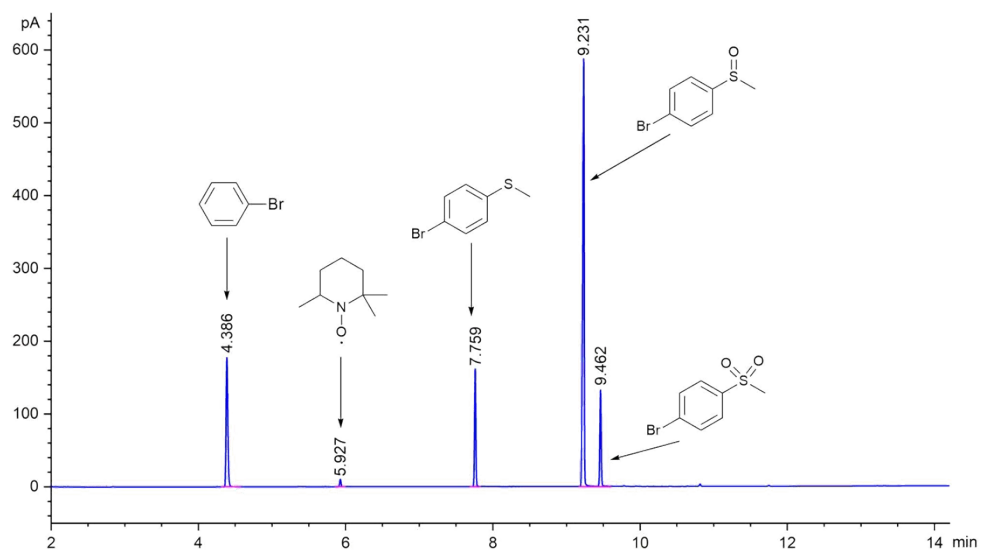

Table 3, Entry 10

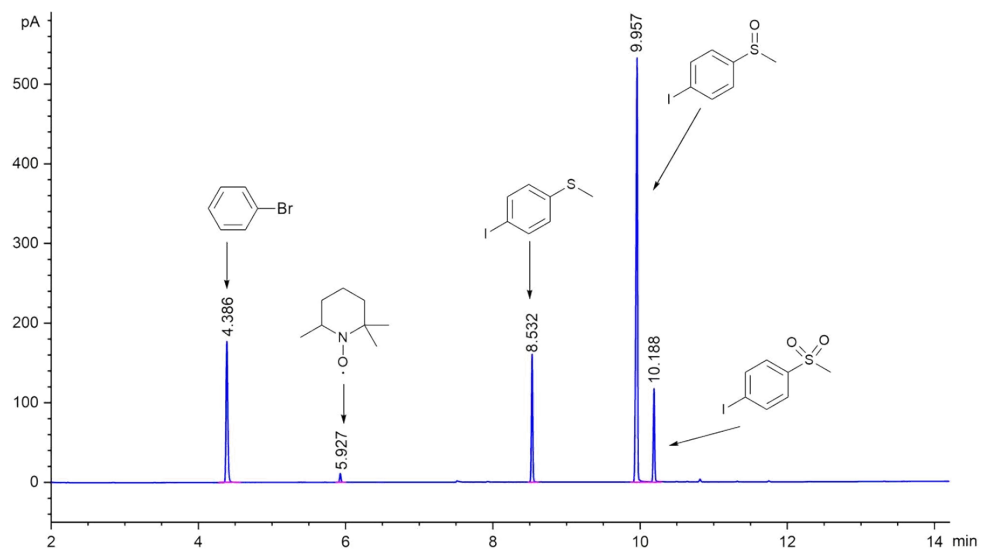

Table 3, Entry 11

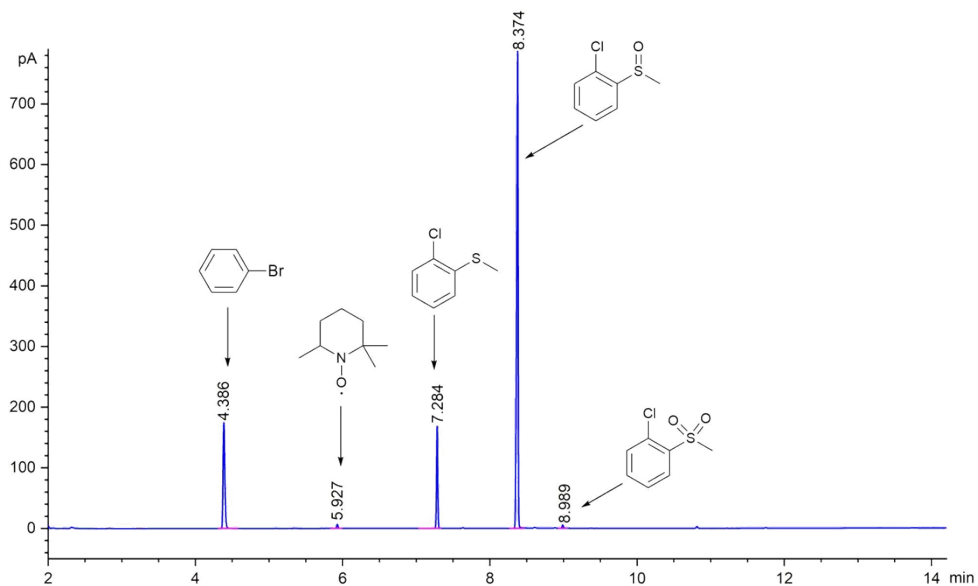

Table 3, Entry 12

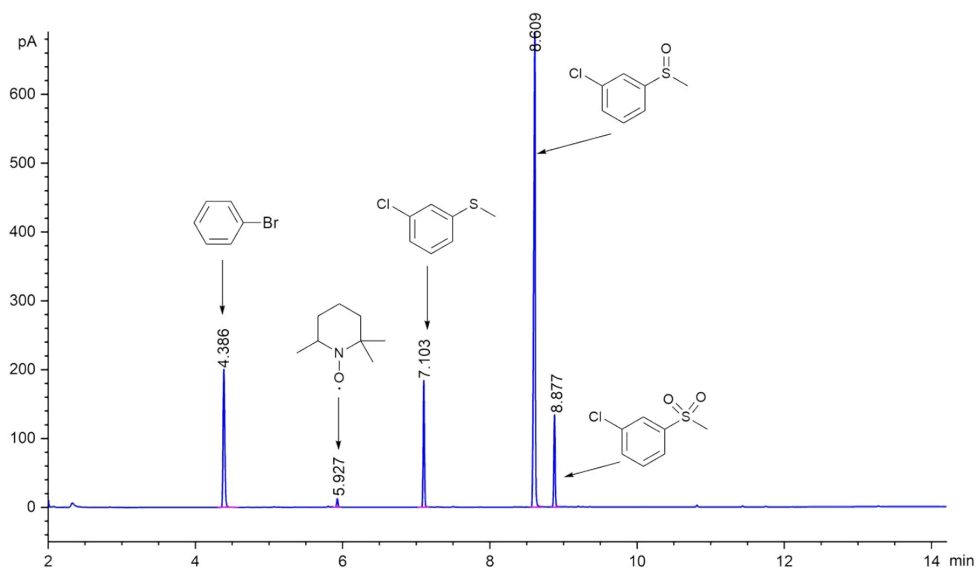

Table 3, Entry 13

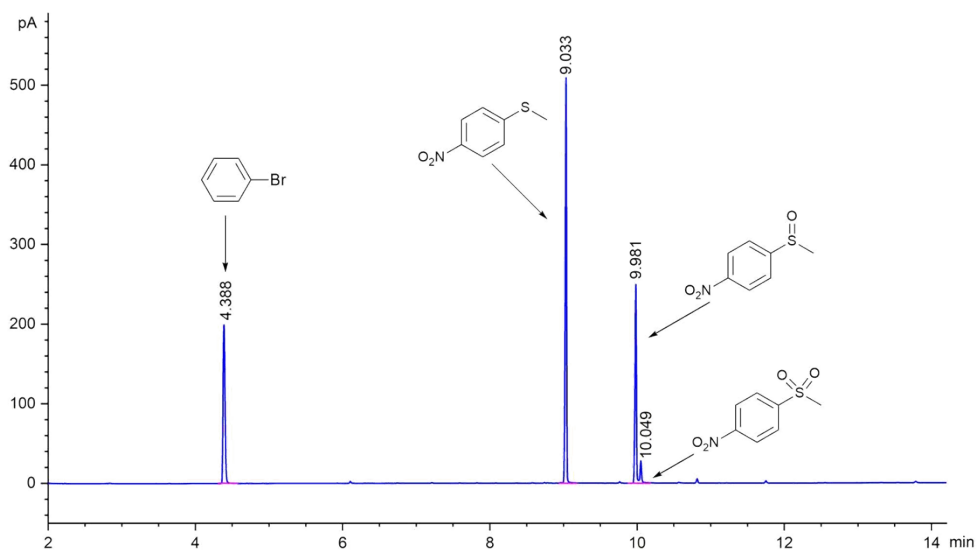

Table 3, Entry 14

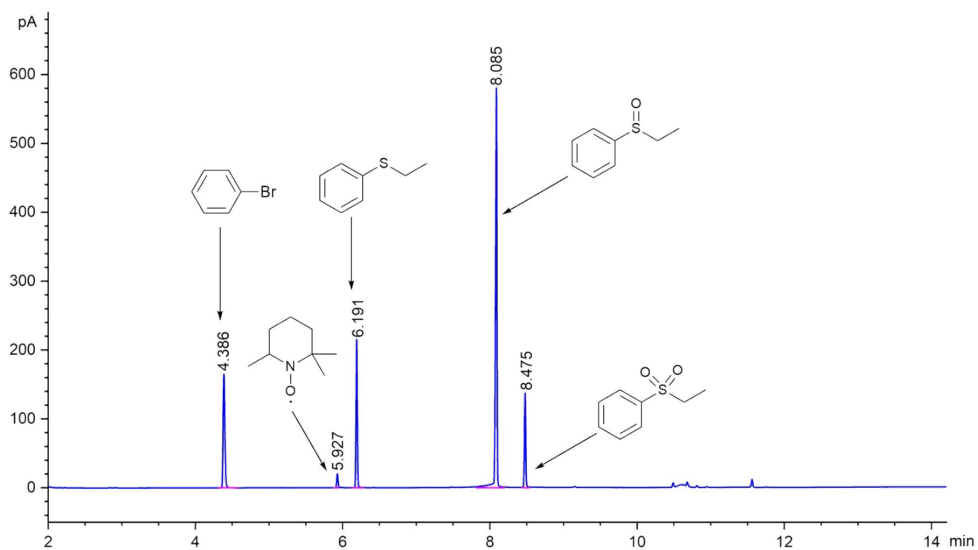

Table 3, Entry 15

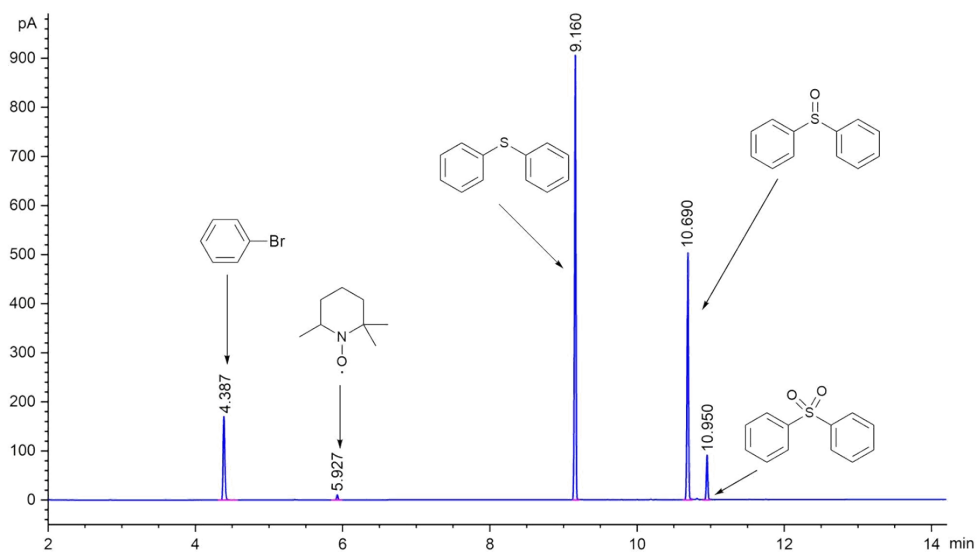

Table 3, Entry 16

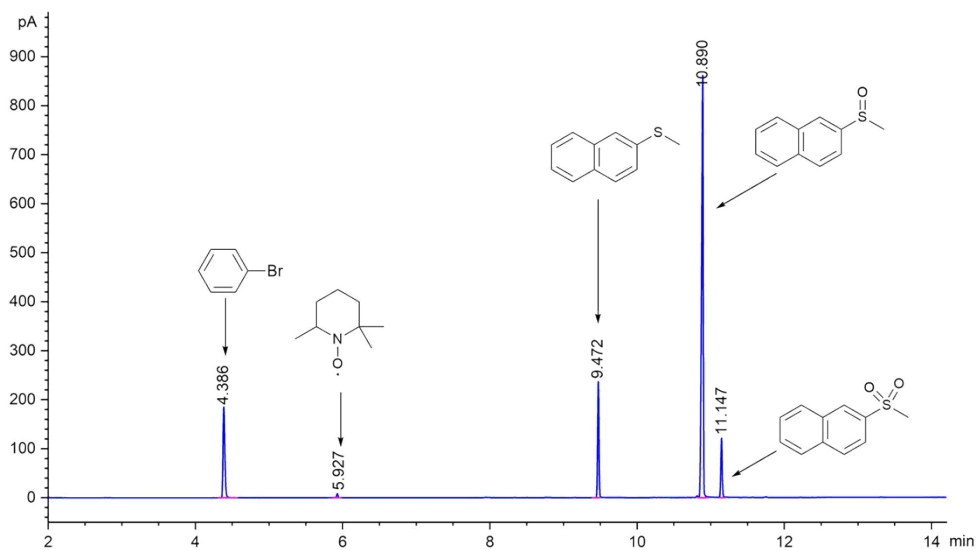

Table 3, Entry 17

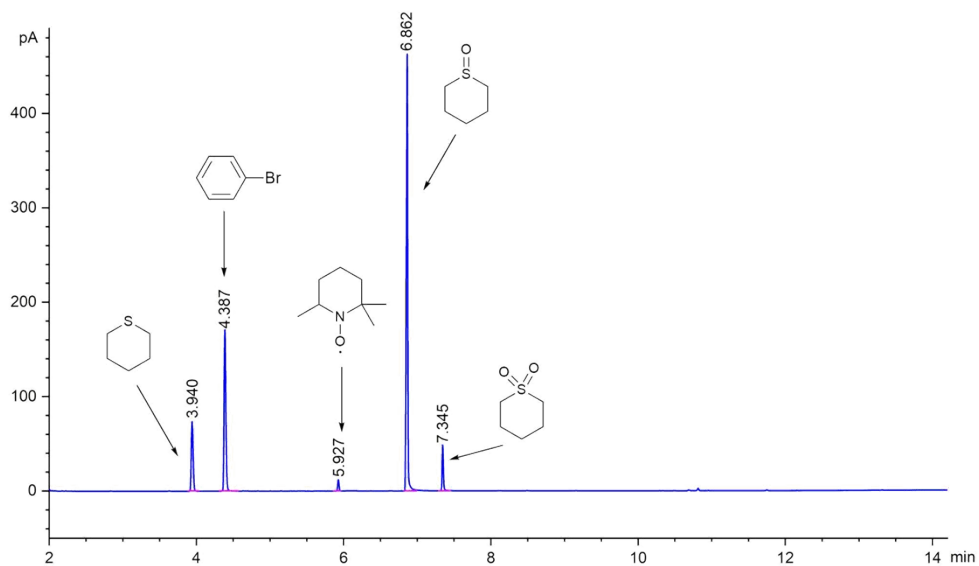

Table 3, Entry 18

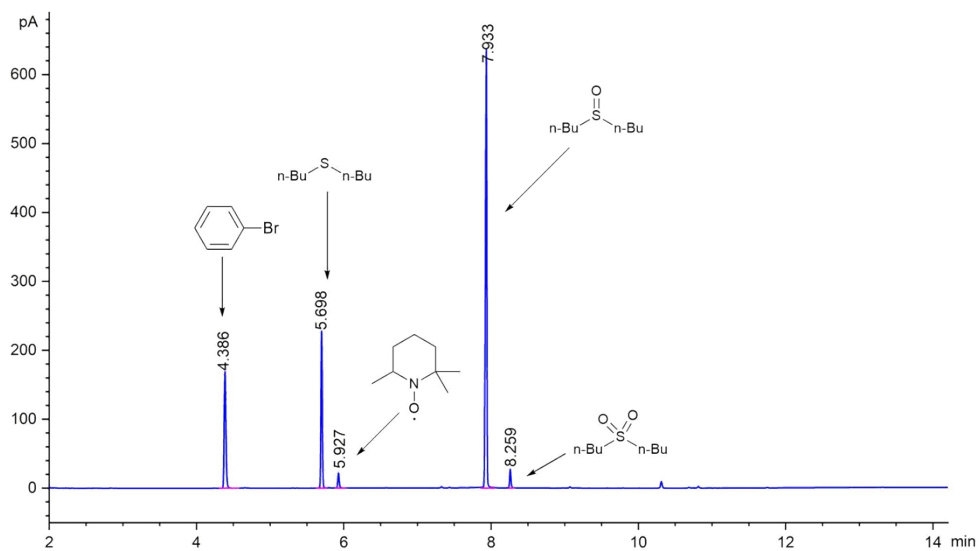

Supplement: d1se00053e1.pdf [file d1se00053e1.pdf]
